# Supplementary material for: RNA-transfection of γ/δ T cells with a chimeric antigen receptor or an α/β T-cell receptor: a safer alternative to genetically engineered α/β T cells for the immunotherapy of melanoma
Source: PubMed Central journal article supplement (PMC5561563; doi:10.1186/s12885-017-3539-3), 2017-08-17
Supplement: 12885_2017_3539_MOESM1_ESM.pdf [file 12885_2017_3539_MOESM1_ESM.pdf]

**TABLE S1. Comparative FACS analysis of different expansion<sup>a</sup> protocols for  $\gamma\delta$ -TCR, CD3, and CD8 expression**

|                          | PBMC + zoledronic acid<br>n = 10 |               | PBMC + OKT3<br>n = 10 |              | MACS <sup>b</sup> CD8 <sup>+</sup> + OKT3<br>n = 7 |              | MACS <sup>c</sup> $\gamma\delta$ <sup>+</sup> + OKT3<br>n = 7 |               |
|--------------------------|----------------------------------|---------------|-----------------------|--------------|----------------------------------------------------|--------------|---------------------------------------------------------------|---------------|
|                          | start                            | end           | start                 | end          | start                                              | end          | start                                                         | end           |
| $\gamma\delta^- / CD3^+$ | 59.2 ± 8.14                      | 11.73 ± 9.29  | 59.2 ± 8.14           | 74.66 ± 5.85 | 90.08 ± 5.21                                       | 86.43 ± 4    | 5.32 ± 5.62                                                   | 2.96 ± 1.89   |
| $\gamma\delta^+ / CD3^+$ | 11.42 ± 6.99                     | 84.61 ± 10.68 | 11.42 ± 6.99          | 18.92 ± 6.05 | 3.68 ± 3.41                                        | 7.91 ± 2.99  | 84.8 ± 10.08                                                  | 91.65 ± 5.08  |
| $\gamma\delta^- / CD3^-$ | 28.47 ± 8.8                      | 2.67 ± 1.6    | 28.47 ± 8.8           | 5.93 ± 2.99  | 5.93 ± 4.41                                        | 5.38 ± 3.86  | 2.99 ± 2.44                                                   | 2.31 ± 1.53   |
| $\gamma\delta^+ / CD3^-$ | 0.91 ± 0.51                      | 0.99 ± 0.78   | 0.91 ± 0.51           | 0.5 ± 0.27   | 0.31 ± 0.28                                        | 0.28 ± 0.19  | 6.89 ± 7.71                                                   | 3.08 ± 1.93   |
| $\gamma\delta^- / CD8^+$ | 26.05 ± 6.86                     | 6.94 ± 6.39   | 26.05 ± 6.86          | 70.42 ± 7.98 | 96.15 ± 3.19                                       | 90.62 ± 3.43 | 1.5 ± 1.53                                                    | 1.77 ± 1.72   |
| $\gamma\delta^+ / CD8^+$ | 1.51 ± 0.78                      | 15.2 ± 7.92   | 1.51 ± 0.78           | 13.19 ± 5.03 | 2.16 ± 1.17                                        | 7.6 ± 2.92   | 15.92 ± 6.96                                                  | 15.87 ± 11.82 |
| $\gamma\delta^- / CD8^-$ | 60.67 ± 6.36                     | 7.81 ± 4.29   | 60.67 ± 6.36          | 10.14 ± 3.24 | 0.45 ± 0.22                                        | 1.32 ± 0.71  | 7.05 ± 6.93                                                   | 3.84 ± 2.08   |
| $\gamma\delta^+ / CD8^-$ | 11.77 ± 7.23                     | 70.5 ± 17.4   | 11.77 ± 7.23          | 6.25 ± 4.87  | 1.24 ± 2.42                                        | 0.46 ± 0.97  | 75.52 ± 9.94                                                  | 78.52 ± 13.52 |

<sup>a</sup>Expansion duration varied from ten to eleven days

<sup>b</sup>CD8<sup>+</sup> T cells were extracted from donor-derived PBMC using magnetic-activated cell sorting

<sup>c</sup> $\gamma\delta$ <sup>+</sup> T cells were extracted from donor-derived PBMC using magnetic-activated cell sorting

<sup>d</sup>Mean ± standard deviation are displayed

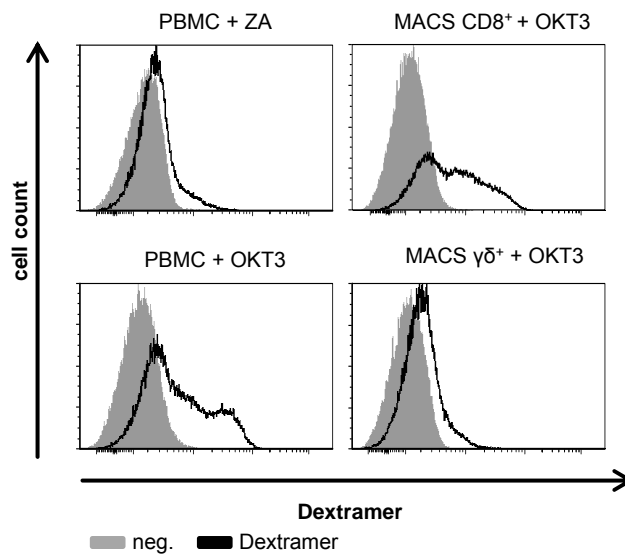

**Figure S1: Expression of a gp100/HLA-A2-specific TCR by different T-cell populations after electroporation.**

Zoledronic acid (ZA)-activated PBMC, OKT3-activated PBMC, OKT3-stimulated MACS-isolated CD8<sup>+</sup> T cells, and OKT3-stimulated MACS-isolated  $\gamma/\delta$  T cells were expanded as described in figure 1. After 10-11 days, these cells were electroporated with RNA coding for the gp100/HLA-A2-specific TCR or with RNA encoding the MCSP-specific CAR. After receptor transfer, T cells were rested for one day and subsequently cryopreserved. After thawing TCR expression was detected using a PE-conjugated MHC-Dextramer HLA-A\*0201/YLEPGPVTV (black lines). CAR-transfected T cells served as negative controls (neg.; filled grey histograms). Presented histograms are representatives out of three independent experiments.

**TABLE S2: P-values corresponding to figure 2 g-j calculated by unpaired Student's t-test**

**time points**

|          | conditions <sup>#</sup>       | 4h                                        | 24h    | 48h | 72h | 96h | 120h |        |
|----------|-------------------------------|-------------------------------------------|--------|-----|-----|-----|------|--------|
| <b>g</b> | <b>TCR vs CAR<sup>a</sup></b> | PBMC + ZA (TCR vs. CAR)                   | ns     | *** | *   | ns  | ns   | ns     |
|          |                               | MACS $\gamma/\delta$ + OKT3 (TCR vs. CAR) | ***    | *** | *** | *** | **   | *      |
| <b>h</b> | <b>CAR vs TCR<sup>b</sup></b> | PBMC + ZA (CAR vs. TCR)                   | **     | *** | **  | *   | *    | 0.0950 |
|          |                               | MACS $\gamma/\delta$ + OKT3 (CAR vs. TCR) | ***    | *** | *** | *** | ***  | ***    |
| <b>i</b> | <b>TCR vs CAR</b>             | PBMC + OKT3 (TCR vs. CAR)                 | 0.0774 | *** | ns  | ns  | ns   | ns     |
|          |                               | MACS CD8 + OKT3 (TCR vs. CAR)             | **     | *** | **  | ns  | ns   | ns     |
| <b>j</b> | <b>CAR vs TCR</b>             | PBMC + OKT3 (CAR vs. TCR)                 | *      | *** | **  | *** | ***  | ***    |
|          |                               | MACS CD8 + OKT3 (CAR vs. TCR)             | ***    | **  | *** | *** | ***  | ***    |

Significance was calculated by unpaired student's t test from 4 independent experiments, \*  $p \leq 0.05$ , \*\*  $p \leq 0.01$ , \*\*\*  $p \leq 0.001$ , ns  $p > 0.1$ , p-values between 0.05 and 0.1 are specified.

<sup>#</sup>Conditions: PBMC + ZA = zoledronic-acid expanded PBMC; PBMC + OKT3 = OKT3-expanded PBMC; MACS CD8 + OKT3 = magnetic-activated cell sorting isolated CD8 T cells expanded with OKT3;  $\gamma/\delta$  + OKT3 = magnetic-activated cell sorting isolated  $\gamma/\delta$  T cells expanded with OKT3; all conditions were either transfected with the gp100 TCR or the MCSP CAR

<sup>a</sup>TCR vs CAR: TCR expression on TCR-transfected T cells against TCR expression on CAR-transfected T cells

<sup>b</sup>CAR vs TCR: CAR expression on CAR-transfected T cells against CAR expression on TCR-transfected T cells

TABLE S3: P-values corresponding to figure 3 calculated by unpaired Student's t-test

cytokines

a

| TARGET     | CONDITION      | IL-2                                                                      | TNF                                                    | IFN $\gamma$ |        |     |
|------------|----------------|---------------------------------------------------------------------------|--------------------------------------------------------|--------------|--------|-----|
| Mel526     | mock vs TCR    | Mel526 PBMC + ZA (mock vs. TCR)                                           | ns                                                     | ns           | ns     |     |
|            |                | Mel526 PBMC + OKT3 (mock vs. TCR)                                         | ns                                                     | ns           | ns     |     |
|            |                | Mel526 MACS CD8 + OKT3 (mock vs. TCR)                                     | ns                                                     | ns           | ns     |     |
|            |                | Mel526 MACS $\gamma\delta$ + OKT3 (mock vs. TCR)                          | ns                                                     | ns           | ns     |     |
|            | TCR vs TCR     | Mel526 PBMC + ZA vs. PBMC + OKT3 (TCR vs. TCR)                            | ns                                                     | ns           | ns     |     |
|            |                | Mel526 PBMC + ZA vs. MACS CD8 + OKT3 (TCR vs. TCR)                        | ns                                                     | ns           | ns     |     |
|            |                | Mel526 PBMC + ZA vs. MACS $\gamma\delta$ + OKT3 (TCR vs. TCR)             | ns                                                     | ns           | ns     |     |
|            |                | Mel526 PBMC + OKT3 vs. MACS CD8 + OKT3 (TCR vs. TCR)                      | ns                                                     | ns           | ns     |     |
|            |                | Mel526 PBMC + OKT3 vs. MACS $\gamma\delta$ + OKT3 (TCR vs. TCR)           | ns                                                     | ns           | ns     |     |
|            |                | Mel526 MACS CD8 + OKT3 vs. MACS $\gamma\delta$ + OKT3 (TCR vs. TCR)       | ns                                                     | ns           | ns     |     |
|            | Mel526 + gp100 | mock vs TCR                                                               | Mel526+gp100 PBMC+ ZA (mock vs. TCR)                   | 0.0713       | ***    | *** |
|            |                |                                                                           | Mel526+gp100 PBMC+ OKT3 (mock vs. TCR)                 | ***          | ***    | *** |
|            |                |                                                                           | Mel526+gp100 MACS CD8 + OKT3 (mock vs. TCR)            | ***          | ***    | *** |
|            |                |                                                                           | Mel526+gp100 MACS $\gamma\delta$ + OKT3 (mock vs. TCR) | *            | *      | *** |
| TCR vs TCR |                | Mel526+gp100 PBMC + ZA vs. PBMC + OKT3 (TCR vs. TCR)                      | ***                                                    | **           | ***    |     |
|            |                | Mel526+gp100 PBMC + ZA vs. MACS CD8 + OKT3 (TCR vs. TCR)                  | ***                                                    | ns           | ***    |     |
|            |                | Mel526+gp100 PBMC + ZA vs. MACS $\gamma\delta$ + OKT3 (TCR vs. TCR)       | ns                                                     | ns           | **     |     |
|            |                | Mel526 +gp100 PBMC + OKT3 vs. MACS CD8 + OKT3 (TCR vs. TCR)               | ns                                                     | ns           | 0.0949 |     |
|            |                | Mel526+gp100 PBMC + OKT3 vs. MACS $\gamma\delta$ + OKT3 (TCR vs. TCR)     | ***                                                    | **           | ***    |     |
|            |                | Mel526+gp100 MACS CD8 + OKT3 vs. MACS $\gamma\delta$ + OKT3 (TCR vs. TCR) | ***                                                    | *            | ***    |     |
| A375M      | mock vs TCR    | A375M PBMC+ ZA (mock vs. TCR)                                             | ns                                                     | ns           | ns     |     |
|            |                | A375M PBMC+ OKT3 (mock vs. TCR)                                           | ns                                                     | ns           | ns     |     |
|            |                | A375M MACS CD8 + OKT3 (mock vs. TCR)                                      | ns                                                     | ns           | ns     |     |
|            |                | A375M MACS $\gamma\delta$ + OKT3 (mock vs. TCR)                           | ns                                                     | ns           | ns     |     |
|            | TCR vs TCR     | A375M PBMC + ZA vs. PBMC + OKT3 (TCR vs. TCR)                             | ns                                                     | ns           | ns     |     |
|            |                | A375M PBMC + ZA vs. MACS CD8 + OKT3 (TCR vs. TCR)                         | ns                                                     | ns           | ns     |     |
|            |                | A375M PBMC + ZA vs. MACS $\gamma\delta$ + OKT3 (TCR vs. TCR)              | ns                                                     | ns           | ns     |     |
|            |                | A375M PBMC + OKT3 vs. MACS CD8 + OKT3 (TCR vs. TCR)                       | ns                                                     | ns           | ns     |     |
|            |                | A375M PBMC + OKT3 vs. MACS $\gamma\delta$ + OKT3 (TCR vs. TCR)            | ns                                                     | ns           | ns     |     |
|            |                | A375M MACS CD8 + OKT3 vs. MACS $\gamma\delta$ + OKT3 (TCR vs. TCR)        | ns                                                     | ns           | ns     |     |
|            | A375M + gp100  | mock vs TCR                                                               | A375M+gp100 PBMC+ ZA (mock vs. TCR)                    | ***          | ***    | *** |
|            |                |                                                                           | A375M+gp100 PBMC+ OKT3 (mock vs. TCR)                  | ***          | ***    | *** |
|            |                |                                                                           | A375M+gp100 MACS CD8 + OKT3 (mock vs. TCR)             | ***          | ***    | *** |
|            |                |                                                                           | A375M+gp100 MACS $\gamma\delta$ + OKT3 (mock vs. TCR)  | **           | ***    | *** |
| TCR vs TCR |                | A375M+gp100 PBMC + ZA vs. PBMC + OKT3 (TCR vs. TCR)                       | ***                                                    | ***          | ***    |     |
|            |                | A375M+gp100 PBMC + ZA vs. MACS CD8 + OKT3 (TCR vs. TCR)                   | ***                                                    | *            | **     |     |
|            |                | A375M+gp100 PBMC + ZA vs. MACS $\gamma\delta$ + OKT3 (TCR vs. TCR)        | ***                                                    | ***          | ***    |     |
|            |                | A375M+gp100 PBMC + OKT3 vs. MACS CD8 + OKT3 (TCR vs. TCR)                 | ns                                                     | **           | ns     |     |
|            |                | A375M+gp100 PBMC + OKT3 vs. MACS $\gamma\delta$ + OKT3 (TCR vs. TCR)      | ***                                                    | ***          | ***    |     |
|            |                | A375M+gp100 MACS CD8 + OKT3 vs. MACS $\gamma\delta$ + OKT3 (TCR vs. TCR)  | ***                                                    | ***          | ***    |     |
| Mel526     | mock vs CAR    | Mel526 PBMC+ ZA (mock vs. CAR)                                            | *                                                      | **           | ***    |     |
|            |                | Mel526 PBMC+ OKT3 (mock vs. CAR)                                          | ***                                                    | ***          | ***    |     |
|            |                | Mel526 MACS CD8 + OKT3 (mock vs. CAR)                                     | ***                                                    | ***          | ***    |     |
|            |                | Mel526 MACS $\gamma\delta$ + OKT3 (mock vs. CAR)                          | ns                                                     | 0.0678       | **     |     |
|            | CAR vs CAR     | Mel526 PBMC + ZA vs. PBMC + OKT3 (CAR vs. CAR)                            | ***                                                    | ***          | ***    |     |
|            |                | Mel526 PBMC + ZA vs. MACS CD8 + OKT3 (CAR vs. CAR)                        | ***                                                    | ***          | ***    |     |
|            |                | Mel526 PBMC + ZA vs. MACS $\gamma\delta$ + OKT3 (CAR vs. CAR)             | *                                                      | *            | **     |     |
|            |                | Mel526 PBMC + OKT3 vs. MACS CD8 + OKT3 (CAR vs. CAR)                      | ns                                                     | ns           | ns     |     |
|            |                | Mel526 PBMC + OKT3 vs. MACS $\gamma\delta$ + OKT3 (CAR vs. CAR)           | ***                                                    | ***          | ***    |     |
|            |                | Mel526 MACS CD8 + OKT3 vs. MACS $\gamma\delta$ + OKT3 (CAR vs. CAR)       | ***                                                    | ***          | ***    |     |
|            | T2.A1          | mock vs CAR                                                               | T2.A1 PBMC + ZA (mock vs. CAR)                         | ns           | ns     | ns  |
|            |                |                                                                           | T2.A1 PBMC + OKT3 (mock vs. CAR)                       | ns           | ns     | ns  |
|            |                |                                                                           | T2.A1 MACS CD8 + OKT3 (mock vs. CAR)                   | ns           | ns     | ns  |
|            |                |                                                                           | T2.A1 MACS $\gamma\delta$ + OKT3 (mock vs. CAR)        | ns           | ns     | ns  |
| CAR vs CAR |                | T2.A1 PBMC + ZA vs. PBMC + OKT3 (CAR vs. CAR)                             | ns                                                     | ns           | ns     |     |
|            |                | T2.A1 PBMC + ZA vs. MACS CD8 + OKT3 (CAR vs. CAR)                         | ns                                                     | ns           | ns     |     |
|            |                | T2.A1 PBMC + ZA vs. MACS $\gamma\delta$ + OKT3 (CAR vs. CAR)              | ns                                                     | ns           | ns     |     |
|            |                | T2.A1 PBMC + OKT3 vs. MACS CD8 + OKT3 (CAR vs. CAR)                       | ns                                                     | ns           | ns     |     |
|            |                | T2.A1 PBMC + OKT3 vs. MACS $\gamma\delta$ + OKT3 (CAR vs. CAR)            | ns                                                     | ns           | ns     |     |
|            |                | T2.A1 MACS CD8 + OKT3 vs. MACS $\gamma\delta$ + OKT3 (CAR vs. CAR)        | ns                                                     | ns           | ns     |     |
| A375M      | mock vs CAR    | A375M PBMC+ ZA (mock vs. CAR)                                             | *                                                      | ***          | ***    |     |
|            |                | A375M PBMC+ OKT3 (mock vs. CAR)                                           | ***                                                    | ***          | ***    |     |
|            |                | A375M MACS CD8 + OKT3 (mock vs. CAR)                                      | ***                                                    | ***          | ***    |     |
|            |                | A375M MACS $\gamma\delta$ + OKT3 (mock vs. CAR)                           | *                                                      | ***          | ***    |     |
|            | CAR vs CAR     | A375M PBMC + ZA vs. PBMC + OKT3 (CAR vs. CAR)                             | ***                                                    | ***          | ***    |     |
|            |                | A375M PBMC + ZA vs. MACS CD8 + OKT3 (CAR vs. CAR)                         | ***                                                    | ***          | ***    |     |
|            |                | A375M PBMC + ZA vs. MACS $\gamma\delta$ + OKT3 (CAR vs. CAR)              | **                                                     | ***          | **     |     |
|            |                | A375M PBMC + OKT3 vs. MACS CD8 + OKT3 (CAR vs. CAR)                       | ns                                                     | ns           | ns     |     |
|            |                | A375M PBMC + OKT3 vs. MACS $\gamma\delta$ + OKT3 (CAR vs. CAR)            | ***                                                    | ***          | ***    |     |
|            |                | A375M MACS CD8 + OKT3 vs. MACS $\gamma\delta$ + OKT3 (CAR vs. CAR)        | ***                                                    | ***          | ***    |     |

b

Significance was calculated by unpaired student's t test from 7 to 10 independent experiments. \*  $p \leq 0.05$ , \*\*  $p \leq 0.01$ , \*\*\*  $p \leq 0.001$ , ns  $p > 0.1$ , p-values between 0.05 and 0.1 are specified. Conditions: PBMC + ZA = zoledronic-acid expanded PBMC; PBMC + OKT3 = OKT3-expanded PBMC; MACS CD8 + OKT3 = magnetic-activated cell sorting isolated CD8 T cells expanded with OKT3;  $\gamma\delta$  + OKT3 = magnetic-activated cell sorting isolated  $\gamma\delta$  T cells expanded with OKT3; all conditions were either electroporated with no RNA (mock) or transfected with the gp100 TCR or the MCSP CAR

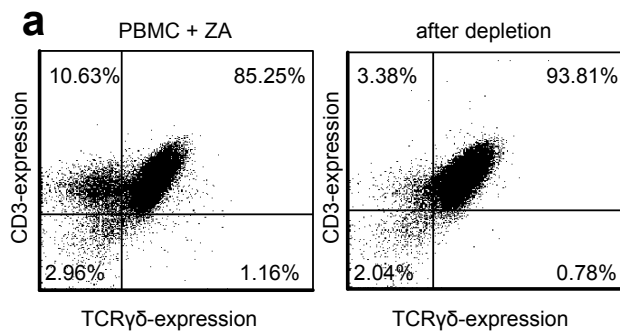

**Figure S2: Zoledronic acid-expanded  $\gamma\delta$  T cells retain their cytokine secretory capacity after depletion of  $\gamma\delta^-$  cells.**

**a** Donor-derived PBMC were expanded with ZA (PBMC + ZA) as explained above (Fig. 1). Following 10 days of expansion, untouched  $\gamma\delta^-$  T cells were isolated from an aliquot of stimulated cells via negative selection using the TCR  $\gamma\delta^-$  T Cell Isolation Kit (after depletion). Subsequently, a  $\gamma\delta^-$  and CD3 double staining was employed to flow-cytometrically verify the successful depletion procedure. **b+c** On day 11, negatively isolated  $\gamma\delta^-$  T cells (after depletion, grey bars) and the remaining ZA-expanded T cells (black bars) were electroporated with RNA coding for the gp100/A2-specific TCR (**b**) or with RNA encoding the MCSP-specific CAR (**c**). T cells electroporated without RNA (mock) served as controls (**b+c**). Antigen-specific cytokine secretion was determined as described above (Fig. 3). Data represent means  $\pm$  SEM from 4 independent experiments. P values calculated by unpaired Student's t test are presented in additional file 6: Table ST4.

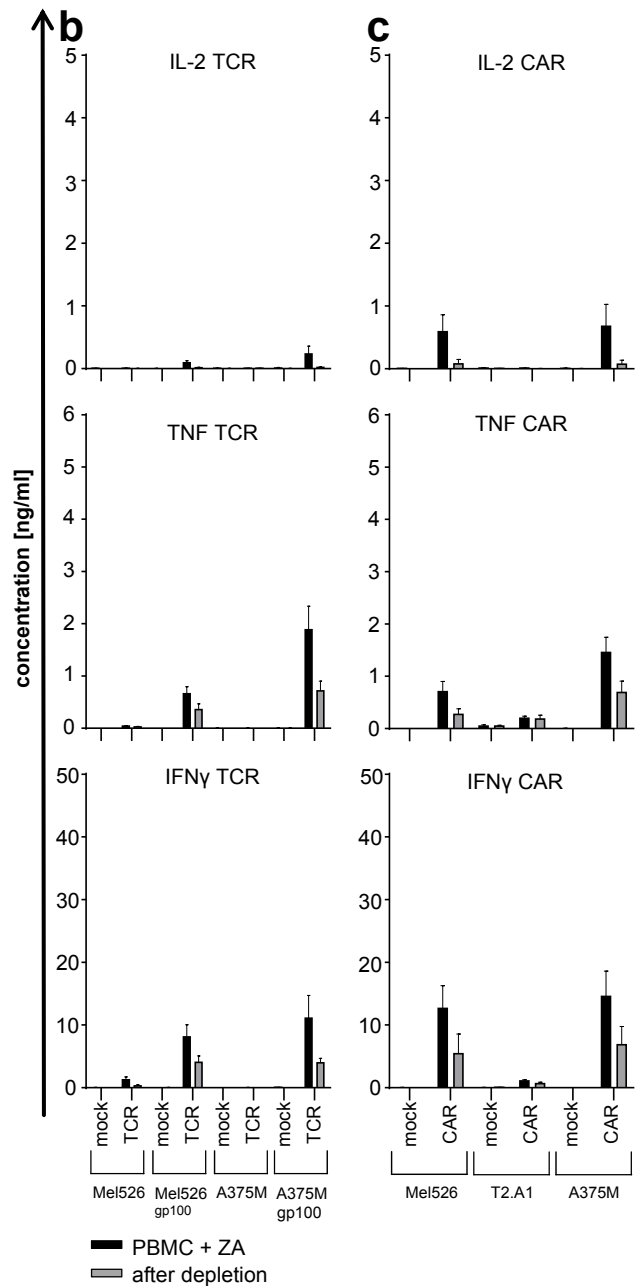

TABLE S4: P-values corresponding to figure S2b and c calculated by unpaired Student's t-test

cytokines

| TARGET       | CONDITION             | IL-2                                              | TNF                                                             | IFN $\gamma$ |        |        |
|--------------|-----------------------|---------------------------------------------------|-----------------------------------------------------------------|--------------|--------|--------|
| <b>b</b>     | <b>Mel526</b>         | mock vs TCR                                       | Mel526 PBMC + ZA (mock vs. TCR)                                 | ns           | ns     | ns     |
|              |                       | TCR vs TCR                                        | Mel526 after depletion (mock vs. TCR)                           | ns           | ns     | ns     |
|              | <b>Mel526 + gp100</b> | mock vs TCR                                       | Mel526+gp100 PBMC+ ZA (mock vs. TCR)                            | 0.0713       | ***    | ***    |
|              |                       |                                                   | Mel526+gp100 after depletion (mock vs. TCR)                     | ns           | **     | **     |
|              |                       | TCR vs TCR                                        | Mel526+gp100 PBMC + ZA vs. PBMC + after depletion (TCR vs. TCR) | ns           | ns     | *      |
|              |                       |                                                   | A375M PBMC+ ZA (mock vs. TCR)                                   | ns           | ns     | ns     |
| <b>A375M</b> | TCR vs TCR            | A375M after depletion (mock vs. TCR)              | ns                                                              | ns           | ns     |        |
|              |                       | A375M PBMC + ZA vs. after depletion (TCR vs. TCR) | ns                                                              | ns           | ns     |        |
| <b>c</b>     | <b>Mel526</b>         | mock vs CAR                                       | Mel526 PBMC+ ZA (mock vs. CAR)                                  | *            | **     | ***    |
|              |                       |                                                   | Mel526 after depletion (mock vs. CAR)                           | ns           | 0.0794 | *      |
|              |                       | CAR vs CAR                                        | Mel526 PBMC + ZA vs. after depletion (CAR vs. CAR)              | 0.0853       | 0.0786 | 0.0603 |
|              |                       |                                                   | T2.A1 PBMC + ZA (mock vs. CAR)                                  | ns           | ns     | ns     |
|              | <b>T2.A1</b>          | CAR vs CAR                                        | T2.A1 after depletion (mock vs. CAR)                            | ns           | ns     | ns     |
|              |                       |                                                   | T2.A1 PBMC + ZA vs. after depletion (CAR vs. CAR)               | ns           | ns     | ns     |
| <b>A375M</b> | mock vs CAR           | A375M PBMC+ ZA (mock vs. CAR)                     | *                                                               | ***          | ***    |        |
|              |                       | A375M after depletion (mock vs. CAR)              | ns                                                              | ***          | *      |        |
|              | CAR vs CAR            | A375M PBMC + ZA vs. after depletion (CAR vs. CAR) | *                                                               | **           | *      |        |

Significance was calculated by unpaired student's t test from 4 independent experiments, \* p  $\leq$  0.05, \*\* p  $\leq$  0.01, \*\*\* p  $\leq$  0.001, ns p > 0.1, p-values between 0.05 and 0.1 are specified.  
 Conditions: PBMC + ZA = zoledronic-acid expanded PBMC; after depletion = negatively selected  $\gamma\delta$  T cells from ZA-expanded PBMC; all conditions were either electroporated with no RNA (mock) or transfected with the gp100 TCR or the MCSP CAR

TABLE S5: P-values corresponding to figure 5 a and b calculated by unpaired Student's t-test

effector to target ratio

| TARGET                                                                   | CONDITION                                                          | 60 : 1                                                                     | 20 : 1                                                               | 6 : 1  | 2 : 1  |        |        |
|--------------------------------------------------------------------------|--------------------------------------------------------------------|----------------------------------------------------------------------------|----------------------------------------------------------------------|--------|--------|--------|--------|
| <b>a</b>                                                                 | Mel526<br>mock vs TCR                                              | Mel526 PBMC + ZA (mock vs. TCR)                                            | **                                                                   | ns     | ns     | ns     |        |
|                                                                          |                                                                    | Mel526 PBMC + OKT3 (mock vs. TCR)                                          | ***                                                                  | *      | ns     | ns     |        |
|                                                                          |                                                                    | Mel526 MACS CD8 + OKT3 (mock vs. TCR)                                      | ***                                                                  | **     | ns     | ns     |        |
|                                                                          |                                                                    | Mel526 MACS $\gamma\delta$ + OKT3 (mock vs. TCR)                           | 0.0790                                                               | 0.0621 | ns     | ns     |        |
|                                                                          | Mel526<br>mock vs mock                                             | Mel526 PBMC + ZA vs. PBMC + OKT3 (mock vs. mock)                           | ns                                                                   | ns     | ns     | ns     |        |
|                                                                          |                                                                    | Mel526 PBMC + ZA vs. MACS CD8 + OKT3 (mock vs. mock)                       | ***                                                                  | *      | *      | ns     |        |
|                                                                          |                                                                    | Mel526 PBMC + ZA vs. MACS $\gamma\delta$ + OKT3 (mock vs. mock)            | ns                                                                   | ns     | ns     | ns     |        |
|                                                                          |                                                                    | Mel526 PBMC + OKT3 vs. MACS CD8 + OKT3 (mock vs. mock)                     | **                                                                   | ns     | ns     | ns     |        |
|                                                                          |                                                                    | Mel526 PBMC + OKT3 vs. MACS $\gamma\delta$ + OKT3 (mock vs. mock)          | ns                                                                   | ns     | ns     | ns     |        |
|                                                                          |                                                                    | Mel526 MACS CD8 + OKT3 vs. MACS $\gamma\delta$ + OKT3 (mock vs. mock)      | **                                                                   | ns     | ns     | ns     |        |
|                                                                          | Mel526<br>TCR vs TCR                                               | Mel526 PBMC + ZA vs. PBMC + OKT3 (TCR vs. TCR)                             | ns                                                                   | ns     | ns     | ns     |        |
|                                                                          |                                                                    | Mel526 PBMC + ZA vs. MACS CD8 + OKT3 (TCR vs. TCR)                         | ns                                                                   | ns     | ns     | ns     |        |
|                                                                          |                                                                    | Mel526 PBMC + ZA vs. MACS $\gamma\delta$ + OKT3 (TCR vs. TCR)              | ns                                                                   | ns     | ns     | ns     |        |
|                                                                          |                                                                    | Mel526 PBMC + OKT3 vs. MACS CD8 + OKT3 (TCR vs. TCR)                       | ns                                                                   | ns     | ns     | ns     |        |
|                                                                          |                                                                    | Mel526 PBMC + OKT3 vs. MACS $\gamma\delta$ + OKT3 (TCR vs. TCR)            | ns                                                                   | ns     | ns     | ns     |        |
|                                                                          |                                                                    | Mel526 MACS CD8 + OKT3 vs. MACS $\gamma\delta$ + OKT3 (TCR vs. TCR)        | ns                                                                   | ns     | ns     | ns     |        |
|                                                                          | A375M                                                              | mock vs TCR                                                                | A375M PBMC+ ZA (mock vs. TCR)                                        | ns     | ns     | ns     | ns     |
|                                                                          |                                                                    |                                                                            | A375M PBMC+ OKT3 (mock vs. TCR)                                      | ns     | ns     | ns     | ns     |
|                                                                          |                                                                    |                                                                            | A375M MACS CD8 + OKT3 (mock vs. TCR)                                 | ns     | ns     | ns     | ns     |
|                                                                          |                                                                    |                                                                            | A375M MACS $\gamma\delta$ + OKT3 (mock vs. TCR)                      | ns     | ns     | ns     | ns     |
| mock vs mock                                                             |                                                                    | A375M PBMC + ZA vs. PBMC + OKT3 (mock vs. mock)                            | *                                                                    | ns     | *      | ns     |        |
|                                                                          |                                                                    | A375M PBMC + ZA vs. MACS CD8 + OKT3 (mock vs. mock)                        | *                                                                    | 0.0693 | 0.0560 | ns     |        |
|                                                                          |                                                                    | A375M PBMC + ZA vs. MACS $\gamma\delta$ + OKT3 (mock vs. mock)             | ns                                                                   | ns     | ns     | ns     |        |
|                                                                          |                                                                    | A375M PBMC + OKT3 vs. MACS CD8 + OKT3 (mock vs. mock)                      | ns                                                                   | ns     | ns     | ns     |        |
|                                                                          |                                                                    | A375M PBMC + OKT3 vs. MACS $\gamma\delta$ + OKT3 (mock vs. mock)           | ns                                                                   | ns     | ns     | ns     |        |
|                                                                          |                                                                    | A375M MACS CD8 + OKT3 vs. MACS $\gamma\delta$ + OKT3 (mock vs. mock)       | ns                                                                   | ns     | ns     | ns     |        |
| TCR vs TCR                                                               |                                                                    | A375M PBMC + ZA vs. PBMC + OKT3 (TCR vs. TCR)                              | ns                                                                   | ns     | ns     | ns     |        |
|                                                                          |                                                                    | A375M PBMC + ZA vs. MACS CD8 + OKT3 (TCR vs. TCR)                          | ns                                                                   | ns     | ns     | ns     |        |
|                                                                          | A375M PBMC + ZA vs. MACS $\gamma\delta$ + OKT3 (TCR vs. TCR)       | ns                                                                         | ns                                                                   | ns     | ns     |        |        |
|                                                                          | A375M PBMC + OKT3 vs. MACS CD8 + OKT3 (TCR vs. TCR)                | ns                                                                         | ns                                                                   | ns     | ns     |        |        |
|                                                                          | A375M PBMC + OKT3 vs. MACS $\gamma\delta$ + OKT3 (TCR vs. TCR)     | ns                                                                         | ns                                                                   | ns     | ns     |        |        |
|                                                                          | A375M MACS CD8 + OKT3 vs. MACS $\gamma\delta$ + OKT3 (TCR vs. TCR) | *                                                                          | ns                                                                   | ns     | ns     |        |        |
| A375M + gp100                                                            | mock vs TCR                                                        | A375M+gp100 PBMC+ ZA (mock vs. TCR)                                        | ***                                                                  | ***    | ns     | ns     |        |
|                                                                          |                                                                    | A375M+gp100 PBMC+ OKT3 (mock vs. TCR)                                      | ***                                                                  | ***    | **     | ns     |        |
|                                                                          |                                                                    | A375M+gp100 MACS CD8 + OKT3 (mock vs. TCR)                                 | ***                                                                  | ***    | *      | ns     |        |
|                                                                          |                                                                    | A375M+gp100 MACS $\gamma\delta$ + OKT3 (mock vs. TCR)                      | ***                                                                  | ***    | 0.0896 | ns     |        |
|                                                                          | mock vs mock                                                       | A375M+gp100 PBMC + ZA vs. PBMC + OKT3 (mock vs. mock)                      | ***                                                                  | *      | *      | *      |        |
|                                                                          |                                                                    | A375M+gp100 PBMC + ZA vs. MACS CD8 + OKT3 (mock vs. mock)                  | ***                                                                  | **     | *      | 0.0527 |        |
|                                                                          |                                                                    | A375M+gp100 PBMC + ZA vs. MACS $\gamma\delta$ + OKT3 (mock vs. mock)       | ns                                                                   | ns     | ns     | ns     |        |
|                                                                          |                                                                    | A375M+gp100 PBMC + OKT3 vs. MACS CD8 + OKT3 (mock vs. mock)                | **                                                                   | ns     | ns     | ns     |        |
|                                                                          |                                                                    | A375M+gp100 PBMC + OKT3 vs. MACS $\gamma\delta$ + OKT3 (mock vs. mock)     | ***                                                                  | *      | 0.0709 | ns     |        |
|                                                                          |                                                                    | A375M+gp100 MACS CD8 + OKT3 vs. MACS $\gamma\delta$ + OKT3 (mock vs. mock) | ***                                                                  | **     | 0.0748 | ns     |        |
|                                                                          | TCR vs TCR                                                         | A375M+gp100 PBMC + ZA vs. PBMC + OKT3 (TCR vs. TCR)                        | ns                                                                   | ns     | ns     | ns     |        |
|                                                                          |                                                                    | A375M+gp100 PBMC + ZA vs. MACS CD8 + OKT3 (TCR vs. TCR)                    | ns                                                                   | ns     | ns     | ns     |        |
| A375M+gp100 PBMC + ZA vs. MACS $\gamma\delta$ + OKT3 (TCR vs. TCR)       |                                                                    | ns                                                                         | ns                                                                   | ns     | ns     |        |        |
| A375M+gp100 PBMC + OKT3 vs. MACS CD8 + OKT3 (TCR vs. TCR)                |                                                                    | ns                                                                         | ns                                                                   | ns     | ns     |        |        |
| A375M+gp100 PBMC + OKT3 vs. MACS $\gamma\delta$ + OKT3 (TCR vs. TCR)     |                                                                    | 0.0658                                                                     | ns                                                                   | ns     | ns     |        |        |
| A375M+gp100 MACS CD8 + OKT3 vs. MACS $\gamma\delta$ + OKT3 (TCR vs. TCR) |                                                                    | ns                                                                         | ns                                                                   | ns     | ns     |        |        |
| <b>b</b>                                                                 | Mel526<br>mock vs CAR                                              | Mel526 PBMC+ ZA (mock vs. CAR)                                             | ***                                                                  | **     | ns     | ns     |        |
|                                                                          |                                                                    | Mel526 PBMC+ OKT3 (mock vs. CAR)                                           | ***                                                                  | ***    | ***    | 0.0645 |        |
|                                                                          |                                                                    | Mel526 MACS CD8 + OKT3 (mock vs. CAR)                                      | ***                                                                  | ***    | *      | ns     |        |
|                                                                          |                                                                    | Mel526 MACS $\gamma\delta$ + OKT3 (mock vs. CAR)                           | *                                                                    | **     | ns     | ns     |        |
|                                                                          | Mel526<br>CAR vs CAR                                               | Mel526 PBMC + ZA vs. PBMC + OKT3 (CAR vs. CAR)                             | ns                                                                   | 0.0937 | ns     | ns     |        |
|                                                                          |                                                                    | Mel526 PBMC + ZA vs. MACS CD8 + OKT3 (CAR vs. CAR)                         | ns                                                                   | ns     | ns     | ns     |        |
|                                                                          |                                                                    | Mel526 PBMC + ZA vs. MACS $\gamma\delta$ + OKT3 (CAR vs. CAR)              | ns                                                                   | ns     | ns     | ns     |        |
|                                                                          |                                                                    | Mel526 PBMC + OKT3 vs. MACS CD8 + OKT3 (CAR vs. CAR)                       | ns                                                                   | ns     | ns     | ns     |        |
|                                                                          |                                                                    | Mel526 PBMC + OKT3 vs. MACS $\gamma\delta$ + OKT3 (CAR vs. CAR)            | ns                                                                   | 0.0652 | ns     | ns     |        |
|                                                                          |                                                                    | Mel526 MACS CD8 + OKT3 vs. MACS $\gamma\delta$ + OKT3 (CAR vs. CAR)        | ns                                                                   | ns     | ns     | ns     |        |
|                                                                          | T2.A1                                                              | mock vs CAR                                                                | T2.A1 PBMC + ZA (mock vs. CAR)                                       | ns     | ns     | ns     | ns     |
|                                                                          |                                                                    |                                                                            | T2.A1 PBMC + OKT3 (mock vs. CAR)                                     | ns     | ns     | 0.0880 | *      |
|                                                                          |                                                                    |                                                                            | T2.A1 MACS CD8 + OKT3 (mock vs. CAR)                                 | **     | *      | ns     | ns     |
|                                                                          |                                                                    |                                                                            | T2.A1 MACS $\gamma\delta$ + OKT3 (mock vs. CAR)                      | ns     | ns     | ns     | ns     |
|                                                                          |                                                                    | mock vs mock                                                               | T2.A1 PBMC + ZA vs. PBMC + OKT3 (mock vs. mock)                      | *      | *      | ns     | ns     |
|                                                                          |                                                                    |                                                                            | T2.A1 PBMC + ZA vs. MACS CD8 + OKT3 (mock vs. mock)                  | ***    | **     | *      | ns     |
|                                                                          |                                                                    |                                                                            | T2.A1 PBMC + ZA vs. MACS $\gamma\delta$ + OKT3 (mock vs. mock)       | ns     | ns     | ns     | ns     |
|                                                                          |                                                                    |                                                                            | T2.A1 PBMC + OKT3 vs. MACS CD8 + OKT3 (mock vs. mock)                | 0.0792 | ns     | ns     | ns     |
|                                                                          |                                                                    |                                                                            | T2.A1 PBMC + OKT3 vs. MACS $\gamma\delta$ + OKT3 (mock vs. mock)     | *      | ns     | ns     | ns     |
|                                                                          |                                                                    |                                                                            | T2.A1 MACS CD8 + OKT3 vs. MACS $\gamma\delta$ + OKT3 (mock vs. mock) | **     | *      | 0.0644 | 0.0734 |
| T2.A1<br>CAR vs CAR                                                      | T2.A1 PBMC + ZA vs. PBMC + OKT3 (CAR vs. CAR)                      | ns                                                                         | ns                                                                   | ns     | ns     |        |        |
|                                                                          | T2.A1 PBMC + ZA vs. MACS CD8 + OKT3 (CAR vs. CAR)                  | ns                                                                         | ns                                                                   | ns     | ns     |        |        |
|                                                                          | T2.A1 PBMC + ZA vs. MACS $\gamma\delta$ + OKT3 (CAR vs. CAR)       | ns                                                                         | ns                                                                   | ns     | ns     |        |        |
|                                                                          | T2.A1 PBMC + OKT3 vs. MACS CD8 + OKT3 (CAR vs. CAR)                | ns                                                                         | ns                                                                   | ns     | 0.0919 |        |        |
|                                                                          | T2.A1 PBMC + OKT3 vs. MACS $\gamma\delta$ + OKT3 (CAR vs. CAR)     | ns                                                                         | ns                                                                   | ns     | ns     |        |        |
|                                                                          | T2.A1 MACS CD8 + OKT3 vs. MACS $\gamma\delta$ + OKT3 (CAR vs. CAR) | ns                                                                         | ns                                                                   | ns     | ns     |        |        |
| A375M                                                                    | mock vs CAR                                                        | A375M PBMC+ ZA (mock vs. CAR)                                              | ***                                                                  | ***    | ns     | ns     |        |
|                                                                          |                                                                    | A375M PBMC+ OKT3 (mock vs. CAR)                                            | ***                                                                  | ***    | ***    | **     |        |
|                                                                          |                                                                    | A375M MACS CD8 + OKT3 (mock vs. CAR)                                       | ***                                                                  | ***    | *      | ns     |        |
|                                                                          |                                                                    | A375M MACS $\gamma\delta$ + OKT3 (mock vs. CAR)                            | *                                                                    | *      | ns     | ns     |        |
|                                                                          | CAR vs CAR                                                         | A375M PBMC + ZA vs. PBMC + OKT3 (CAR vs. CAR)                              | ns                                                                   | ns     | ns     | ns     |        |
|                                                                          |                                                                    | A375M PBMC + ZA vs. MACS CD8 + OKT3 (CAR vs. CAR)                          | ns                                                                   | ns     | ns     | ns     |        |
|                                                                          |                                                                    | A375M PBMC + ZA vs. MACS $\gamma\delta$ + OKT3 (CAR vs. CAR)               | ns                                                                   | ns     | ns     | ns     |        |
|                                                                          |                                                                    | A375M PBMC + OKT3 vs. MACS CD8 + OKT3 (CAR vs. CAR)                        | ns                                                                   | ns     | 0.0641 | ns     |        |
|                                                                          |                                                                    | A375M PBMC + OKT3 vs. MACS $\gamma\delta$ + OKT3 (CAR vs. CAR)             | ns                                                                   | ns     | ns     | ns     |        |
|                                                                          |                                                                    | A375M MACS CD8 + OKT3 vs. MACS $\gamma\delta$ + OKT3 (CAR vs. CAR)         | ns                                                                   | ns     | ns     | ns     |        |

Significance was calculated by unpaired student's t test from 4 to 7 independent experiments, \*  $p \leq 0.05$ , \*\*  $p \leq 0.01$ , \*\*\*  $p \leq 0.001$ , ns  $p > 0.1$ , p-values between 0.05 and 0.1 are specified.

Conditions: PBMC + ZA = zoledronic-acid expanded PBMC; PBMC + OKT3 = OKT3-expanded PBMC; MACS CD8 + OKT3 = magnetic-activated cell sorting isolated CD8 T cells expanded with OKT3;  $\gamma\delta$  + OKT3 = magnetic-activated cell sorting isolated  $\gamma\delta$  T cells expanded with OKT3; all conditions were either electroporated with no RNA (mock) or transfected with the gp100 TCR or the MCSP CAR

TABLE S6: P-values corresponding to figure 5 c and d calculated by unpaired Student's t-test

effector to target ratio

| TARGET              |                      | CONDITION                                                 | 60 : 1                                               | 20 : 1 | 6 : 1  | 2 : 1 |        |
|---------------------|----------------------|-----------------------------------------------------------|------------------------------------------------------|--------|--------|-------|--------|
| <b>c</b>            | <b>Mel526</b>        | <b>mock vs TCR</b>                                        | Mel526 PBMC + ZA (mock vs. TCR)                      | **     | ns     | ns    | ns     |
|                     |                      |                                                           | Mel526 after depletion (mock vs. TCR)                | ns     | ns     | ns    | ns     |
|                     |                      | <b>mock vs mock</b>                                       | Mel526 PBMC + ZA vs. after depletion (mock vs. mock) | ns     | ns     | ns    | ns     |
|                     |                      | <b>TCR vs TCR</b>                                         | Mel526 PBMC + ZA vs. after depletion (TCR vs. TCR)   | ns     | ns     | ns    | ns     |
|                     | <b>A375M</b>         | <b>mock vs TCR</b>                                        | A375M PBMC+ ZA (mock vs. TCR)                        | ns     | ns     | ns    | ns     |
|                     |                      |                                                           | A375M PBMC+ after depletion (mock vs. TCR)           | ns     | ns     | ns    | ns     |
|                     |                      | <b>mock vs mock</b>                                       | A375M PBMC + ZA vs. after depletion (mock vs. mock)  | ns     | ns     | ns    | ns     |
|                     |                      | <b>TCR vs TCR</b>                                         | A375M PBMC + ZA vs. after depletion (TCR vs. TCR)    | ns     | ns     | ns    | ns     |
|                     | <b>A375M + gp100</b> | <b>mock vs TCR</b>                                        | A375M+gp100 PBMC+ ZA (mock vs. TCR)                  | ***    | ***    | ns    | ns     |
|                     |                      | A375M+gp100 after depletion (mock vs. TCR)                | ***                                                  | 0.0587 | ns     | ns    |        |
| <b>mock vs mock</b> |                      | A375M+gp100 PBMC + ZA vs. after depletion (mock vs. mock) | ns                                                   | ns     | ns     | ns    |        |
|                     | <b>TCR vs TCR</b>    | A375M+gp100 PBMC + ZA vs. after depletion (TCR vs. TCR)   | ns                                                   | ns     | ns     | ns    |        |
| <b>d</b>            | <b>Mel526</b>        | <b>mock vs CAR</b>                                        | Mel526 PBMC+ ZA (mock vs. CAR)                       | ***    | **     | ns    | ns     |
|                     |                      |                                                           | Mel526 PBMC+ after depletion (mock vs. CAR)          | ns     | 0.0707 | ns    | 0.0645 |
|                     |                      | <b>CAR vs CAR</b>                                         | Mel526 PBMC + ZA vs. after depletion (CAR vs. CAR)   | ns     | ns     | ns    | ns     |
|                     | <b>T2.A1</b>         | <b>mock vs CAR</b>                                        | T2.A1 PBMC + ZA (mock vs. CAR)                       | ns     | ns     | ns    | ns     |
|                     |                      |                                                           | T2.A1 PBMC + after depletion (mock vs. CAR)          | ns     | ns     | ns    | ns     |
|                     |                      | <b>mock vs mock</b>                                       | T2.A1 PBMC + ZA vs. after depletion (mock vs. mock)  | ns     | ns     | ns    | ns     |
|                     |                      | <b>CAR vs CAR</b>                                         | T2.A1 PBMC + ZA vs. after depletion (CAR vs. CAR)    | ns     | ns     | ns    | ns     |
|                     | <b>A375M</b>         | <b>mock vs CAR</b>                                        | A375M PBMC+ ZA (mock vs. CAR)                        | ***    | ***    | ns    | ns     |
|                     |                      |                                                           | A375M PBMC+ after depletion (mock vs. CAR)           | ns     | ns     | ns    | ns     |
|                     | <b>CAR vs CAR</b>    | A375M PBMC + ZA vs. after depletion (CAR vs. CAR)         | *                                                    | ns     | ns     | ns    |        |

Significance was calculated by unpaired student's t test from 3 independent experiments, \* p<0.05, \*\* p<0.01, \*\*\* p<0.001, ns p>0.1, p-values between 0.05 and 0.1 are specified.

Conditions: PBMC + ZA = zoledronic-acid expanded PBMC; after depletion = negatively selected  $\gamma\delta$  T cells from ZA-expanded PBMC; all conditions were either electroporated with no RNA (mock) or transfected with the gp100 TCR or the MCSP CAR



TABLE S7: P-values corresponding to figure 6 calculated by unpaired Student's t-test

effector to target ratio

| TARGET | CONDITION                                                           | 20 : 1                                                                | 6 : 1                                          | 2 : 1  |        |
|--------|---------------------------------------------------------------------|-----------------------------------------------------------------------|------------------------------------------------|--------|--------|
| Daudi  | mock vs TCR                                                         | Mel526 PBMC + ZA (mock vs. TCR)                                       | ns                                             | ns     | ns     |
|        |                                                                     | Mel526 PBMC + OKT3 (mock vs. TCR)                                     | ns                                             | ns     | ns     |
|        |                                                                     | Mel526 MACS CD8 + OKT3 (mock vs. TCR)                                 | ns                                             | ns     | ns     |
|        |                                                                     | Mel526 MACS $\gamma\delta$ + OKT3 (mock vs. TCR)                      | ns                                             | ns     | ns     |
|        | mock vs mock                                                        | Mel526 PBMC + ZA vs. PBMC + OKT3 (mock vs. mock)                      | *                                              | *      | *      |
|        |                                                                     | Mel526 PBMC + ZA vs. MACS CD8 + OKT3 (mock vs. mock)                  | **                                             | **     | 0.0667 |
|        |                                                                     | Mel526 PBMC + ZA vs. MACS $\gamma\delta$ + OKT3 (mock vs. mock)       | ns                                             | ns     | ns     |
|        |                                                                     | Mel526 PBMC + OKT3 vs. MACS CD8 + OKT3 (mock vs. mock)                | ns                                             | ns     | ns     |
|        |                                                                     | Mel526 PBMC + OKT3 vs. MACS $\gamma\delta$ + OKT3 (mock vs. mock)     | ns                                             | ns     | ns     |
|        |                                                                     | Mel526 MACS CD8 + OKT3 vs. MACS $\gamma\delta$ + OKT3 (mock vs. mock) | 0.0860                                         | 0.0778 | ns     |
|        |                                                                     | TCR vs TCR                                                            | Mel526 PBMC + ZA vs. PBMC + OKT3 (TCR vs. TCR) | 0.0602 | 0.0857 |
|        | Mel526 PBMC + ZA vs. MACS CD8 + OKT3 (TCR vs. TCR)                  |                                                                       | **                                             | *      | 0.0697 |
|        | Mel526 PBMC + ZA vs. MACS $\gamma\delta$ + OKT3 (TCR vs. TCR)       |                                                                       | ns                                             | ns     | ns     |
|        | Mel526 PBMC + OKT3 vs. MACS CD8 + OKT3 (TCR vs. TCR)                |                                                                       | ns                                             | ns     | ns     |
|        | Mel526 PBMC + OKT3 vs. MACS $\gamma\delta$ + OKT3 (TCR vs. TCR)     |                                                                       | 0.0646                                         | ns     | ns     |
|        | Mel526 MACS CD8 + OKT3 vs. MACS $\gamma\delta$ + OKT3 (TCR vs. TCR) |                                                                       | *                                              | ns     | ns     |
|        | mock vs CAR                                                         | Mel526 PBMC+ ZA (mock vs. CAR)                                        | ns                                             | ns     | ns     |
|        |                                                                     | Mel526 PBMC+ OKT3 (mock vs. CAR)                                      | ns                                             | ns     | ns     |
|        |                                                                     | Mel526 MACS CD8 + OKT3 (mock vs. CAR)                                 | ns                                             | ns     | ns     |
|        |                                                                     | Mel526 MACS $\gamma\delta$ + OKT3 (mock vs. CAR)                      | ns                                             | ns     | ns     |
|        | CAR vs CAR                                                          | Mel526 PBMC + ZA vs. PBMC + OKT3 (CAR vs. CAR)                        | ns                                             | ns     | ns     |
|        |                                                                     | Mel526 PBMC + ZA vs. MACS CD8 + OKT3 (CAR vs. CAR)                    | **                                             | **     | ns     |
|        |                                                                     | Mel526 PBMC + ZA vs. MACS $\gamma\delta$ + OKT3 (CAR vs. CAR)         | ns                                             | ns     | ns     |
|        |                                                                     | Mel526 PBMC + OKT3 vs. MACS CD8 + OKT3 (CAR vs. CAR)                  | 0.0659                                         | ns     | ns     |
|        |                                                                     | Mel526 PBMC + OKT3 vs. MACS $\gamma\delta$ + OKT3 (CAR vs. CAR)       | ns                                             | ns     | ns     |
|        |                                                                     | Mel526 MACS CD8 + OKT3 vs. MACS $\gamma\delta$ + OKT3 (CAR vs. CAR)   | **                                             | *      | 0.0670 |

Significance was calculated by unpaired student's t test from 3 to 5 independent experiments, \*  $p \leq 0.05$ , \*\*  $p \leq 0.01$ , \*\*\*  $p \leq 0.001$ , ns  $p > 0.1$ , p-values between 0.05 and 0.1 are specified. Conditions: PBMC + ZA = zoledronic-acid expanded PBMC; PBMC + OKT3 = OKT3-expanded PBMC; MACS CD8 + OKT3 = magnetic-activated cell sorting isolated CD8 T cells expanded with OKT3;  $\gamma\delta$  + OKT3 = magnetic-activated cell sorting isolated  $\gamma\delta$  T cells expanded with OKT3; all conditions were either electroporated with no RNA (mock) or transfected with the gp101 TCR or the MCSP CAR
